# Supplementary material for: Unusual absence of FRET in triazole bridged coumarin-hydroxyquinoline, an active sensor for Hg2+ detection
Source: Royal Society of Chemistry journal article supplement (doi:10.1039/d0pp00140f), 2020-07-29
Supplement: d0pp00140f1.pdf [file d0pp00140f1.pdf]

## Supporting Information

### Unusual absence of FRET in triazole bridged coumarin-hydroxyquinoline, an effective sensor for Hg<sup>2+</sup> detection

Surajit Mondal<sup>a</sup>, Niladri Patra<sup>\*a</sup>, Hari Pada Nayek<sup>a</sup>, Sumit K. Hira<sup>b</sup>, Soumit Chatterjee<sup>\*a</sup> and Swapan Dey<sup>\*a</sup>

| Sl. No. | Table of content                                                                                                                                                 | Page No. |
|---------|------------------------------------------------------------------------------------------------------------------------------------------------------------------|----------|
| 1       | Crystal structures and Crystallographic data for <b>R1</b> , <b>R2</b> and <b>R3</b>                                                                             | 2-4      |
| 2       | <sup>1</sup> H NMR, <sup>13</sup> C NMR, Mass and FT-IR spectra of compound 2, compound 3, compound 4, <b>R1</b> , <b>R2</b> and <b>R3</b>                       | 5-15     |
| 3       | Mass and FT-IR spectra of complex (R1+Hg <sup>2+</sup> )                                                                                                         | 15       |
| 4       | Table T1: Fluorescence decay parameters of coumarin amine (C)-quinoline (Q) mixtures and <b>R1</b> at λ <sub>em</sub> = 485 nm and 420 nm.                       | 16       |
| 5       | Table T2: Excited state decay parameters of <b>R1</b> with Hg <sup>2+</sup>                                                                                      | 16       |
| 6       | Table T3: Binding energy from DFT calculation                                                                                                                    | 16       |
| 7       | Fig. S1: Titration spectra; in UV-vis (a) R2:Hg <sup>2+</sup> , (c) R3+ Hg <sup>2+</sup> , and in fluorescence (b) R2:Hg <sup>2+</sup> , (d) R3:Hg <sup>2+</sup> | 17       |
| 8       | Fig. S2: Sensing behavior of R1 towards Hg <sup>2+</sup> under long UV                                                                                           | 17       |
| 9       | Fig. S3: S-V plots from steady state fluorescence emission intensity measurements.                                                                               | 18       |
| 10      | Fig. S4: Lifetime measurement with other metal ion.                                                                                                              | 18       |
| 11      | Fig. S5: Fluorescence decay traces of <b>R1</b> and quinoline-coumarin mixture (2:1) at λ <sub>em</sub> = 485 nm and 420 nm.                                     | 19       |
| 12      | Fig. S6: Binding constant calculation graph of <b>R1</b> with Hg <sup>2+</sup> using Fluorescence titration by using linear regression analysis                  | 20       |
| 13      | Fig. S7: LOD calculation curve of <b>R1</b> with Hg <sup>2+</sup>                                                                                                | 20       |
| 14      | Reversibility test of receptor                                                                                                                                   | 21       |
| 15      | Fig. S10 Job's Plot                                                                                                                                              | 22       |
| 16      | Fig. S12: Energy diagram for d-PET mechanism.                                                                                                                    | 23       |
| 17      | Table T4: Comparative table of triazole based sensor for Hg <sup>2+</sup> from reported literature                                                               | 24       |
| 18      | Synthesis procedure of coumarin azide                                                                                                                            | 24       |

## Crystallographic data for R1

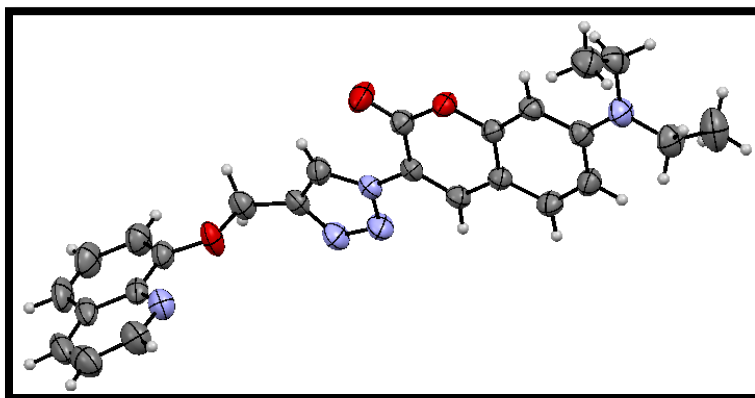

|                                             |                                                               |
|---------------------------------------------|---------------------------------------------------------------|
| Identification code                         | <b>R1</b>                                                     |
| CCDC number                                 | 1944133                                                       |
| Empirical formula                           | C <sub>25</sub> H <sub>23</sub> N <sub>5</sub> O <sub>3</sub> |
| Formula weight                              | 441.48                                                        |
| Temperature/K                               | 293(2)                                                        |
| Crystal system                              | triclinic                                                     |
| Space group                                 | P-1                                                           |
| a/Å                                         | 9.6779(8)                                                     |
| b/Å                                         | 10.4548(10)                                                   |
| c/Å                                         | 12.1262(10)                                                   |
| α/°                                         | 112.874(9)                                                    |
| β/°                                         | 91.882(7)                                                     |
| γ/°                                         | 103.594(7)                                                    |
| Volume/Å <sup>3</sup>                       | 1088.16(18)                                                   |
| Z                                           | 2                                                             |
| ρ <sub>calc</sub> /cm <sup>3</sup>          | 1.347                                                         |
| μ/mm <sup>-1</sup>                          | 0.091                                                         |
| F(000)                                      | 464.0                                                         |
| Crystal size/mm <sup>3</sup>                | 0.15 × 0.13 × 0.11                                            |
| Radiation                                   | MoKα (λ = 0.71073)                                            |
| 2θ range for data collection/°              | 4.372 to 53.998                                               |
| Index ranges                                | -12 ≤ h ≤ 12, -13 ≤ k ≤ 13, -15 ≤ l ≤ 15                      |
| Reflections collected                       | 9010                                                          |
| Independent reflections                     | 4680 [R <sub>int</sub> = 0.0204, R <sub>sigma</sub> = 0.0451] |
| Data/restraints/parameters                  | 4680/0/298                                                    |
| Goodness-of-fit on F <sup>2</sup>           | 0.994                                                         |
| Final R indexes [I ≥ 2σ (I)]                | R <sub>1</sub> = 0.0513, wR <sub>2</sub> = 0.1163             |
| Final R indexes [all data]                  | R <sub>1</sub> = 0.0977, wR <sub>2</sub> = 0.1334             |
| Largest diff. peak/hole / e Å <sup>-3</sup> | 0.15/-0.21                                                    |

## Crystallographic data for R2

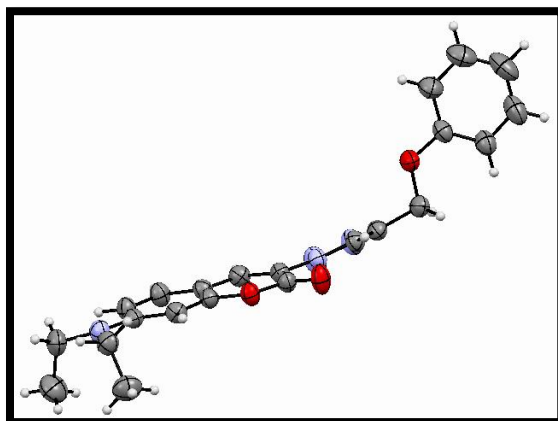

|                                             |                                                               |
|---------------------------------------------|---------------------------------------------------------------|
| Identification code                         | <b>R2</b>                                                     |
| CCDC number                                 | 1904920                                                       |
| Empirical formula                           | C <sub>22</sub> H <sub>22</sub> N <sub>4</sub> O <sub>3</sub> |
| Formula weight                              | 390.43                                                        |
| Temperature/K                               | 293(2)                                                        |
| Crystal system                              | monoclinic                                                    |
| Space group                                 | P2 <sub>1</sub> /c                                            |
| a/Å                                         | 9.5210(11)                                                    |
| b/Å                                         | 19.764(2)                                                     |
| c/Å                                         | 10.8022(12)                                                   |
| α/°                                         | 90                                                            |
| β/°                                         | 103.759(12)                                                   |
| γ/°                                         | 90                                                            |
| Volume/Å <sup>3</sup>                       | 1974.4(4)                                                     |
| Z                                           | 4                                                             |
| ρ <sub>calc</sub> /cm <sup>3</sup>          | 1.314                                                         |
| μ/mm <sup>-1</sup>                          | 0.090                                                         |
| F(000)                                      | 824.0                                                         |
| Crystal size/mm <sup>3</sup>                | 0.16 × 0.02 × 0.01                                            |
| Radiation                                   | MoKα (λ = 0.71073)                                            |
| 2θ range for data collection/°              | 4.122 to 58.738                                               |
| Index ranges                                | -13 ≤ h ≤ 11, -25 ≤ k ≤ 25, -11 ≤ l ≤ 14                      |
| Reflections collected                       | 9990                                                          |
| Independent reflections                     | 4606 [R <sub>int</sub> = 0.0271, R <sub>sigma</sub> = 0.0468] |
| Data/restraints/parameters                  | 4606/0/264                                                    |
| Goodness-of-fit on F <sup>2</sup>           | 1.180                                                         |
| Final R indexes [I ≥ 2σ (I)]                | R <sub>1</sub> = 0.0546, wR <sub>2</sub> = 0.1366             |
| Final R indexes [all data]                  | R <sub>1</sub> = 0.0998, wR <sub>2</sub> = 0.1536             |
| Largest diff. peak/hole / e Å <sup>-3</sup> | 0.13/-0.20                                                    |

### Crystallographic data for R3

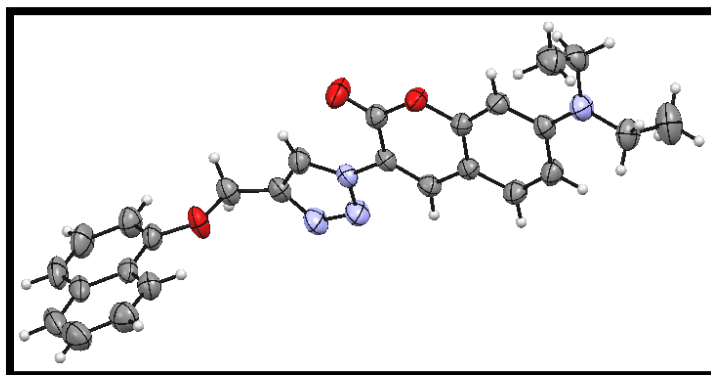

|                                             |                                                               |
|---------------------------------------------|---------------------------------------------------------------|
| Identification code                         | <b>R3</b>                                                     |
| CCDC number                                 | 1904921                                                       |
| Empirical formula                           | C <sub>26</sub> H <sub>24</sub> N <sub>4</sub> O <sub>3</sub> |
| Formula weight                              | 440.49                                                        |
| Temperature/K                               | 293(2)                                                        |
| Crystal system                              | triclinic                                                     |
| Space group                                 | P-1                                                           |
| a/Å                                         | 9.5658(8)                                                     |
| b/Å                                         | 10.6286(15)                                                   |
| c/Å                                         | 12.2495(15)                                                   |
| α/°                                         | 113.080(12)                                                   |
| β/°                                         | 91.151(8)                                                     |
| γ/°                                         | 103.715(9)                                                    |
| Volume/Å <sup>3</sup>                       | 1104.1(2)                                                     |
| Z                                           | 2                                                             |
| ρ <sub>calc</sub> /cm <sup>3</sup>          | 1.325                                                         |
| μ/mm <sup>-1</sup>                          | 0.089                                                         |
| F(000)                                      | 464.0                                                         |
| Crystal size/mm <sup>3</sup>                | 0.15 × 0.02 × 0.01                                            |
| Radiation                                   | MoKα (λ = 0.71073)                                            |
| 2θ range for data collection/°              | 4.322 to 58.704                                               |
| Index ranges                                | -10 ≤ h ≤ 12, -14 ≤ k ≤ 9, -16 ≤ l ≤ 15                       |
| Reflections collected                       | 9589                                                          |
| Independent reflections                     | 5107 [R <sub>int</sub> = 0.0250, R <sub>sigma</sub> = 0.0556] |
| Data/restraints/parameters                  | 5107/0/300                                                    |
| Goodness-of-fit on F <sup>2</sup>           | 1.027                                                         |
| Final R indexes [I ≥ 2σ (I)]                | R <sub>1</sub> = 0.0536, wR <sub>2</sub> = 0.1144             |
| Final R indexes [all data]                  | R <sub>1</sub> = 0.1137, wR <sub>2</sub> = 0.1387             |
| Largest diff. peak/hole / e Å <sup>-3</sup> | 0.13/-0.21                                                    |

## Characteristic experimental data

### $^1\text{H}$ NMR (400 MHz, $\text{CDCl}_3$ ) of Compound 2:

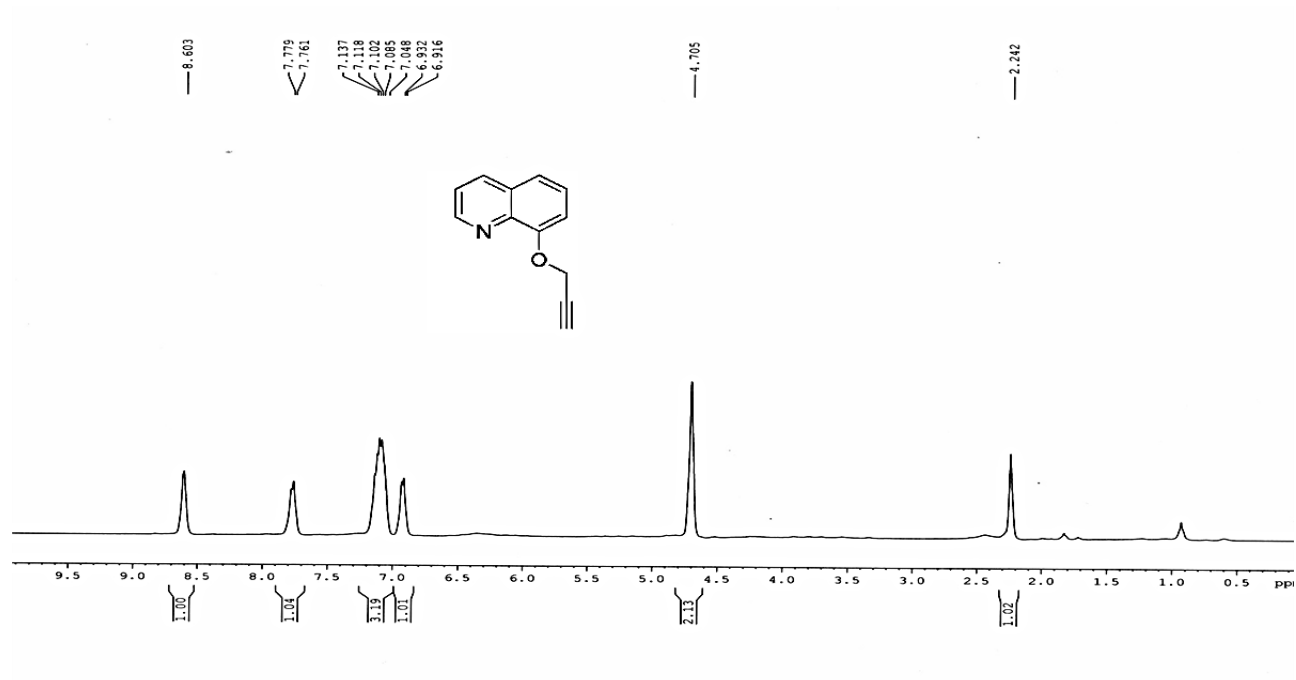

### $^{13}\text{C}$ NMR (100 MHz, $\text{CDCl}_3$ ) of Compound 2:

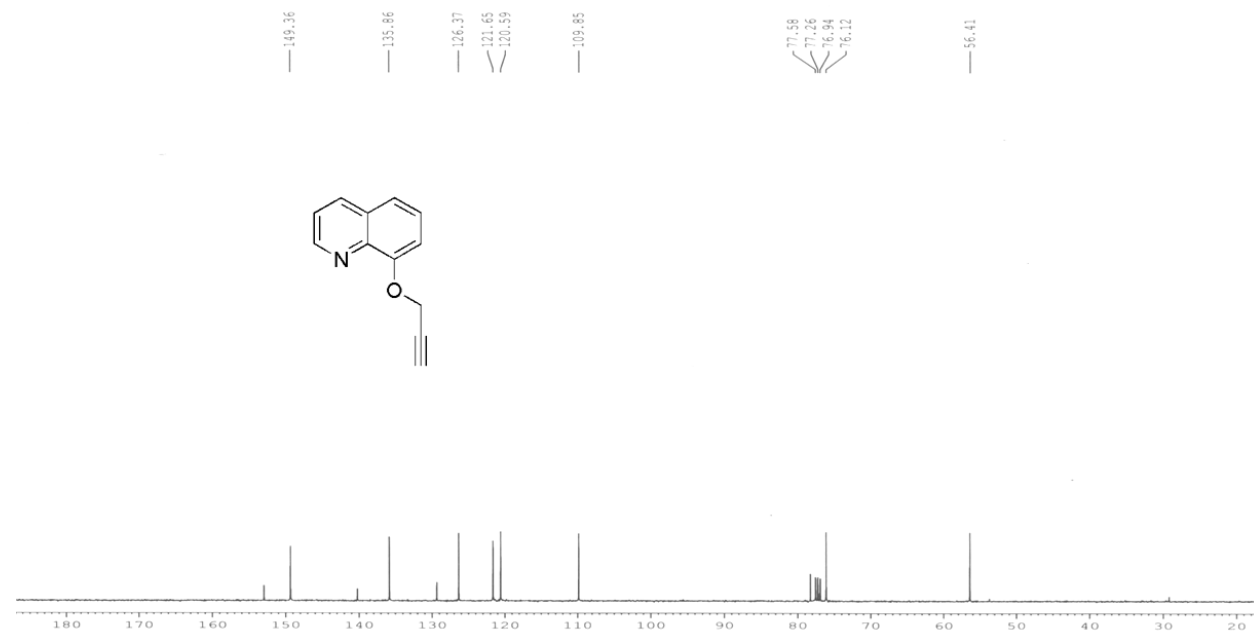

**<sup>1</sup>H NMR (400 MHz, CDCl<sub>3</sub>) of compound 3:**

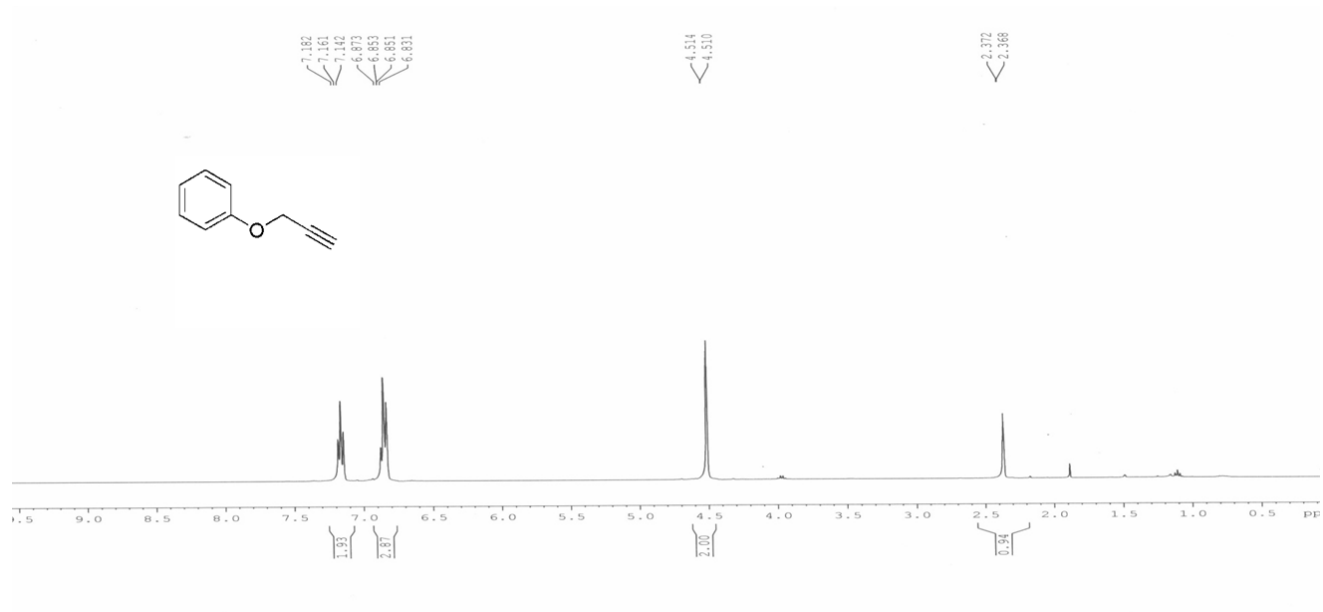

**<sup>13</sup>C NMR (100 MHz, CDCl<sub>3</sub>) of compound 3:**

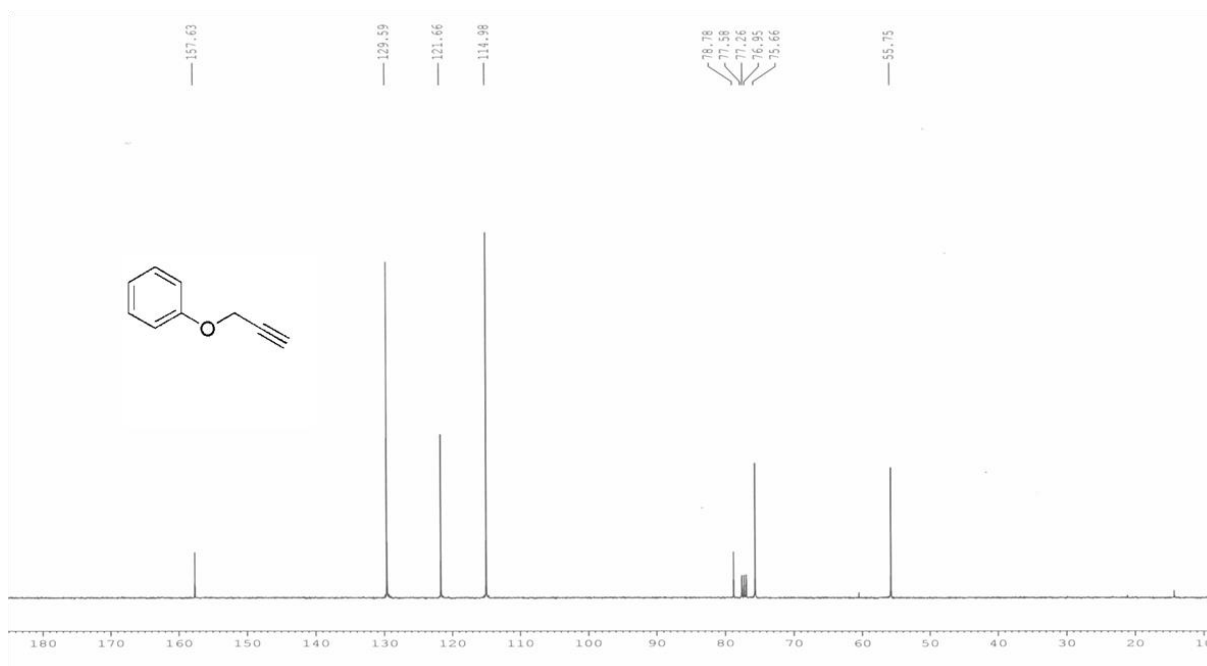

## FT-IR spectra of compound 2

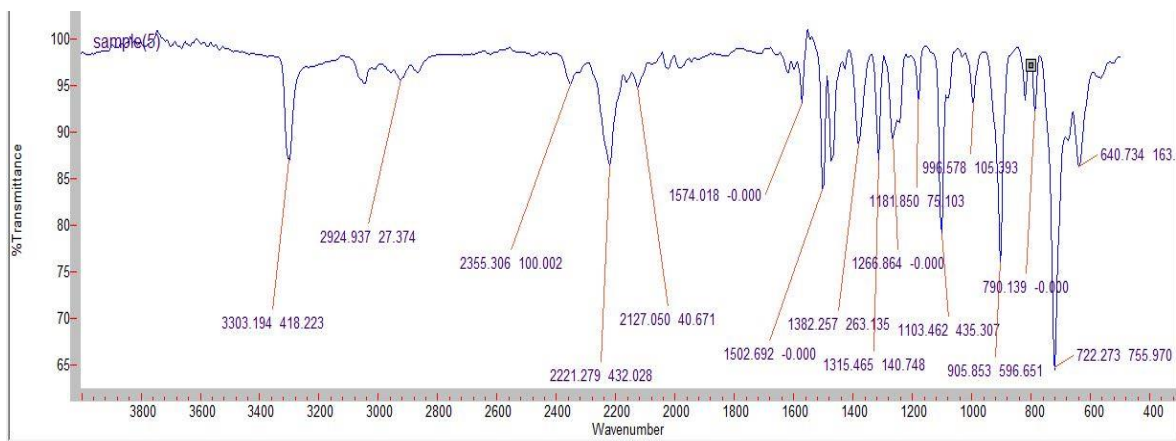

## FT-IR spectra of compound 3:

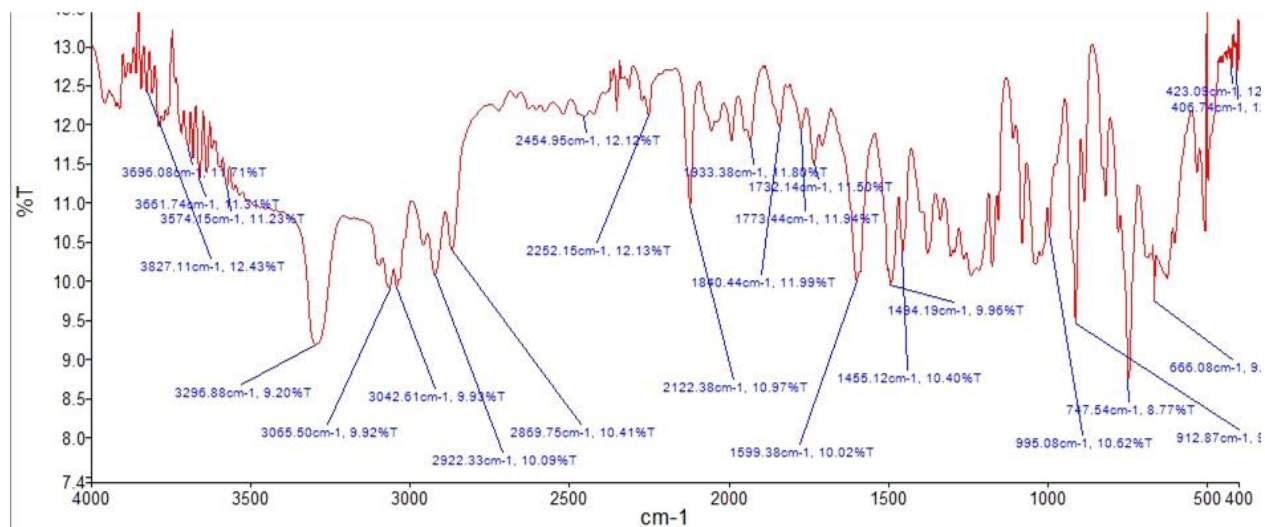

**<sup>1</sup>H NMR of R1 (400 MHz, CDCl<sub>3</sub>):**

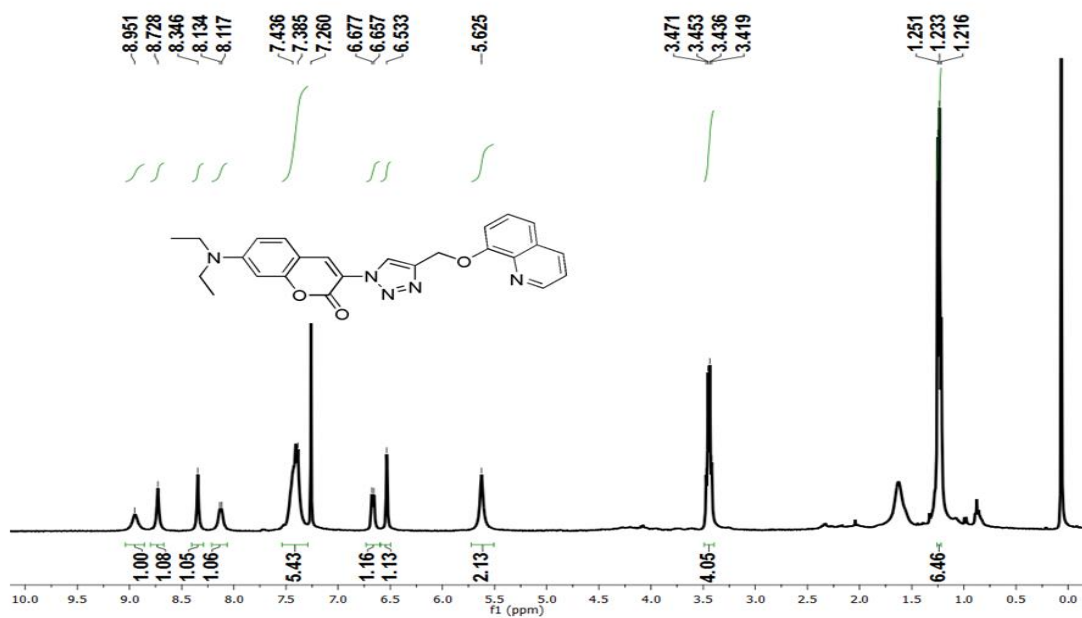

**<sup>13</sup>C NMR of R1 (125 MHz, CDCl<sub>3</sub>):**

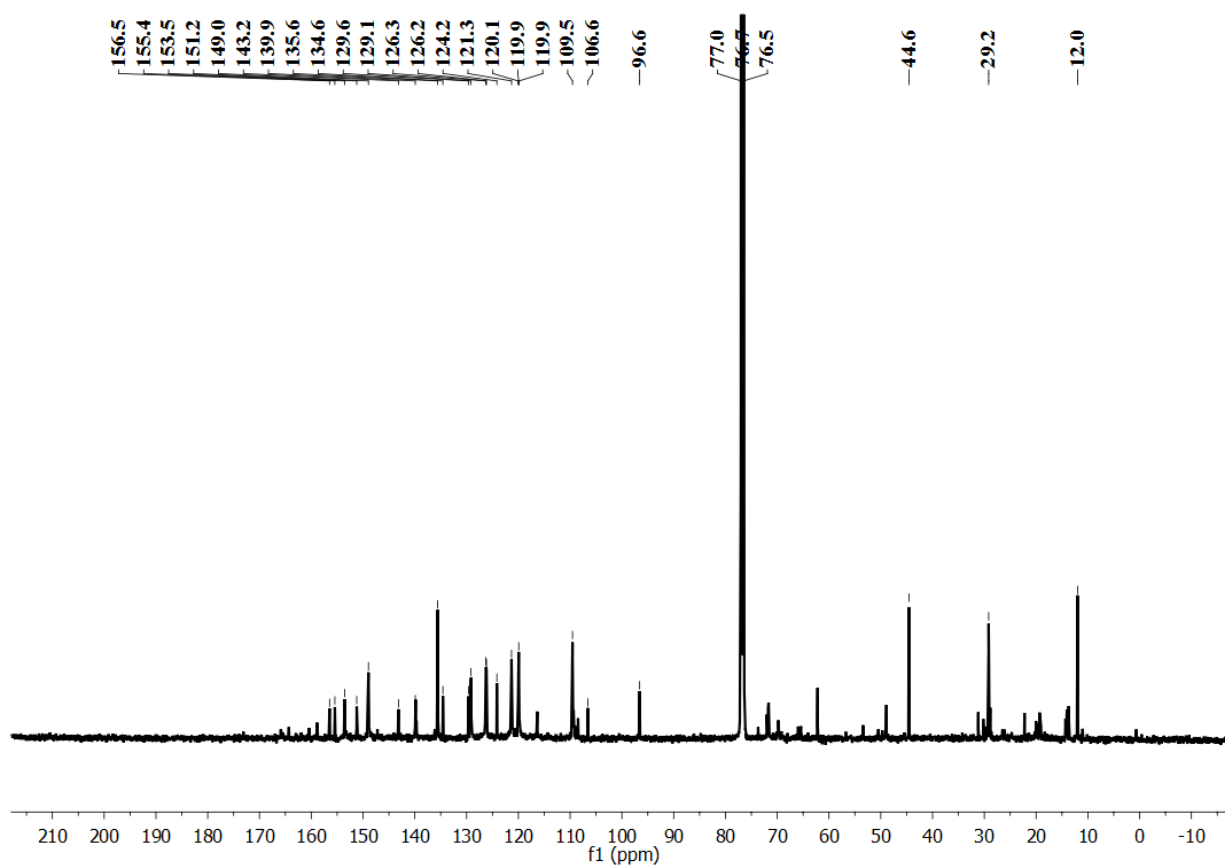



### FT-IR spectra of R1:

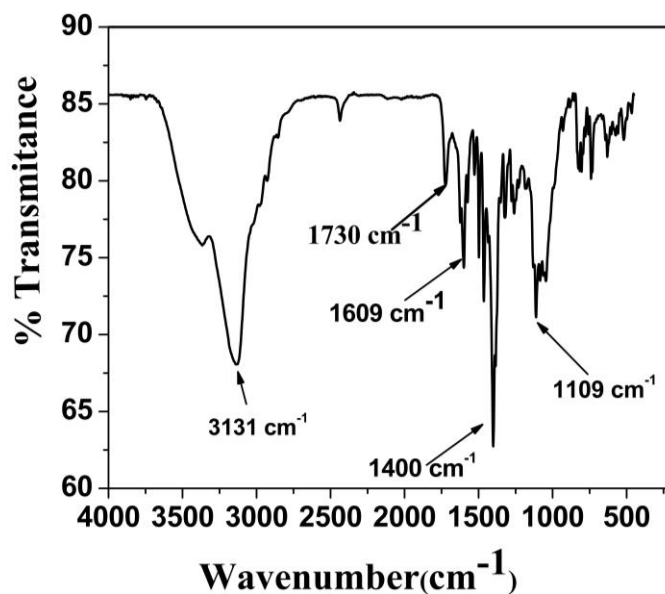

### HRMS Spectra (R1):

Calculated: 441.1801, Found: 442.1874 [M+H]<sup>+</sup>

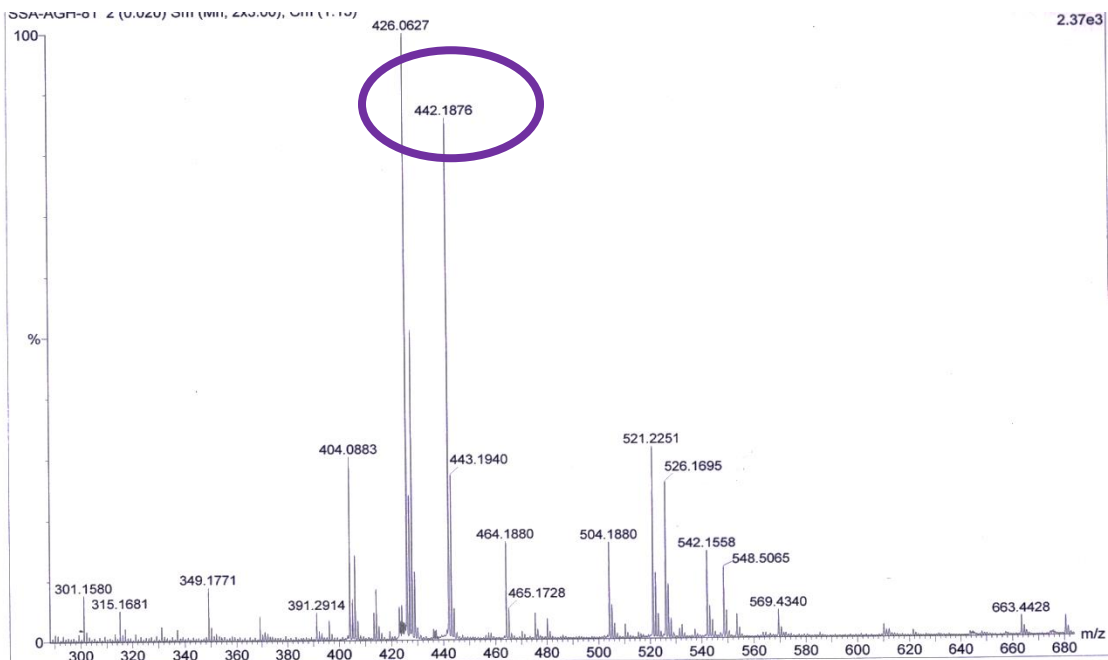

**<sup>1</sup>H NMR of R2 (500 MHz, CDCl<sub>3</sub>):**

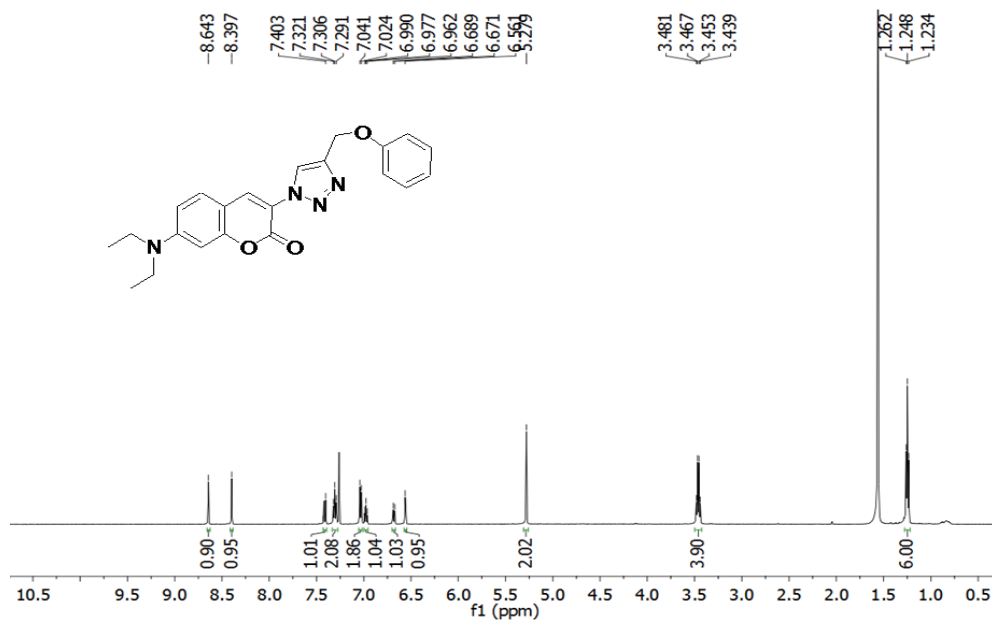

**<sup>13</sup>C NMR of R2 (100 MHz, CDCl<sub>3</sub>)**

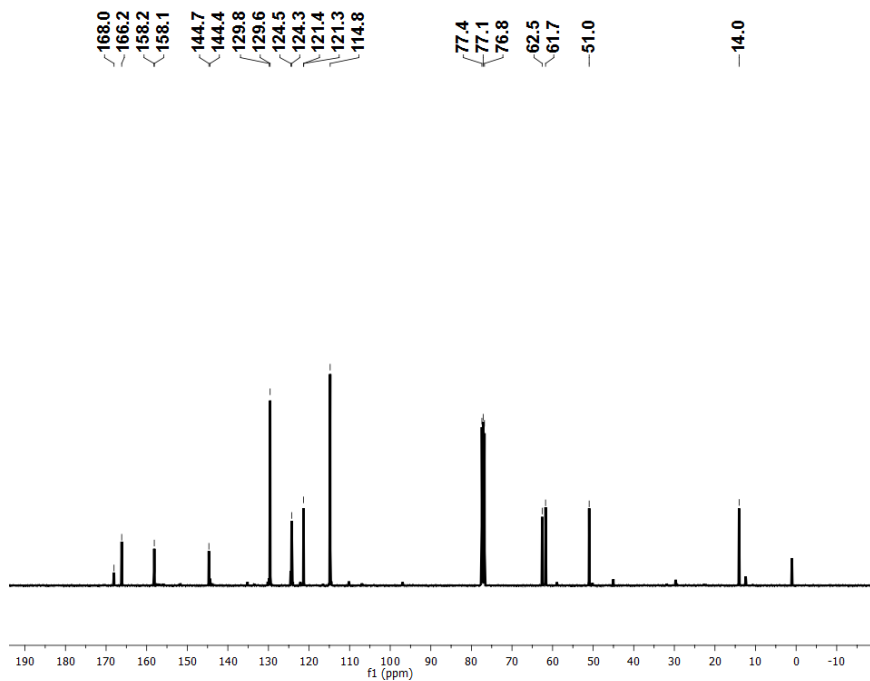

### FT-IR Spectra of R2

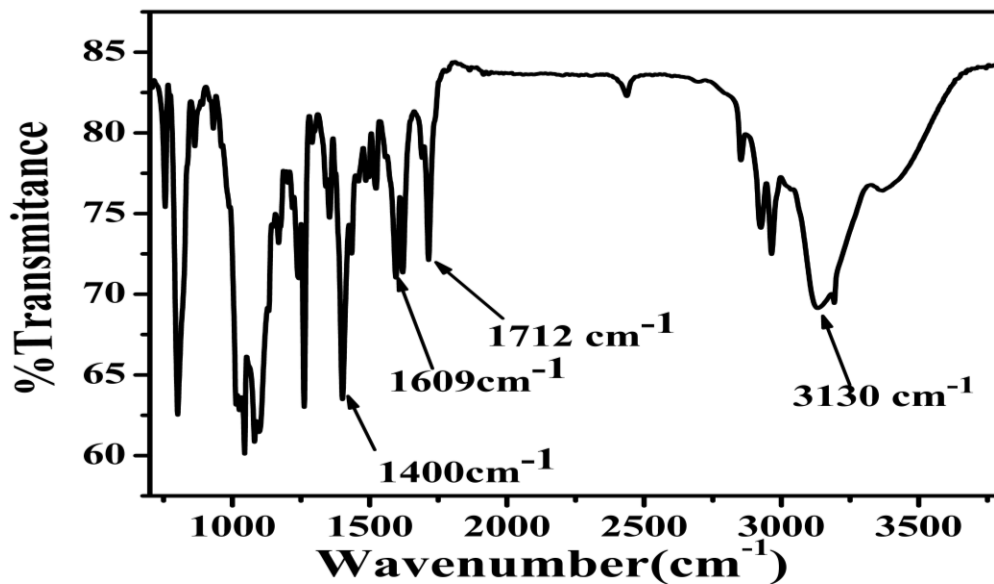

### HRMS Spectra (R2):

Calculated: 390.4351, Mass: 391.1765 [M+H]<sup>+</sup>

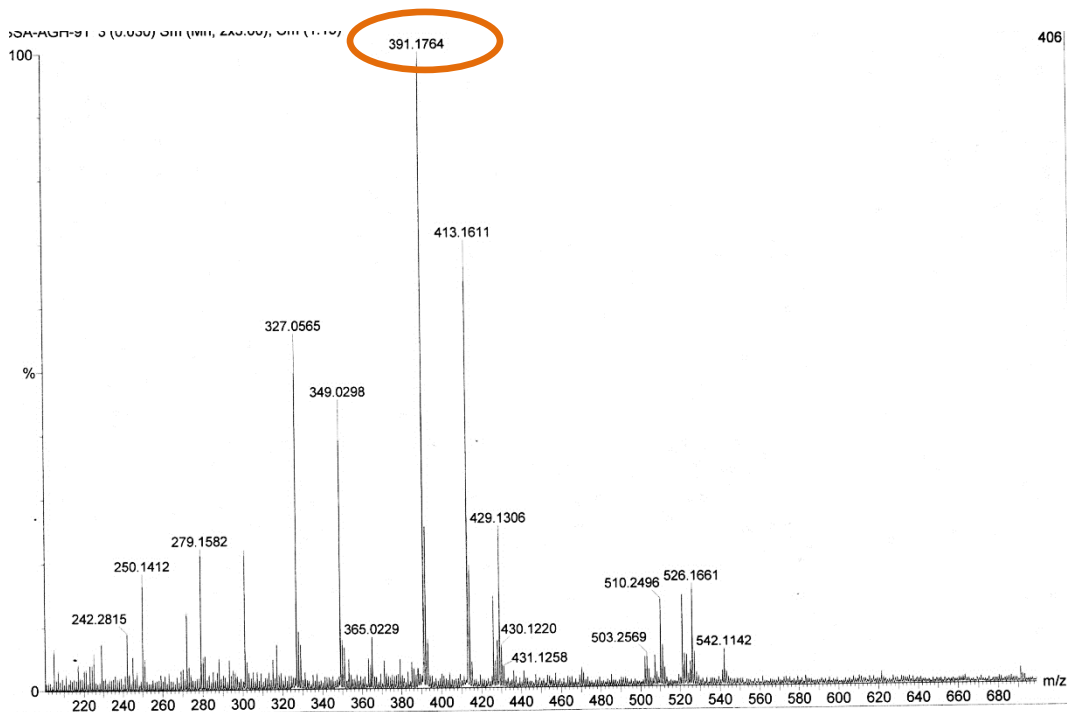

**$^1\text{H}$  NMR (400 MHz,  $\text{CDCl}_3$ ) of Compound 4:**

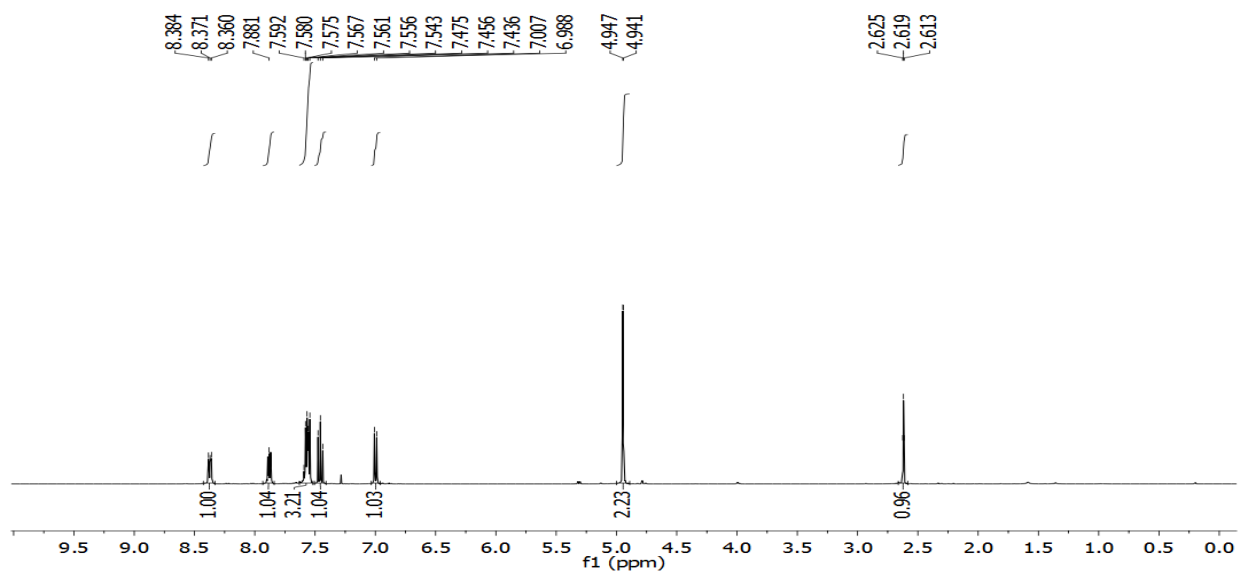

**$^{13}\text{C}$  NMR (100 MHz,  $\text{CDCl}_3$ ) of Compound 4:**

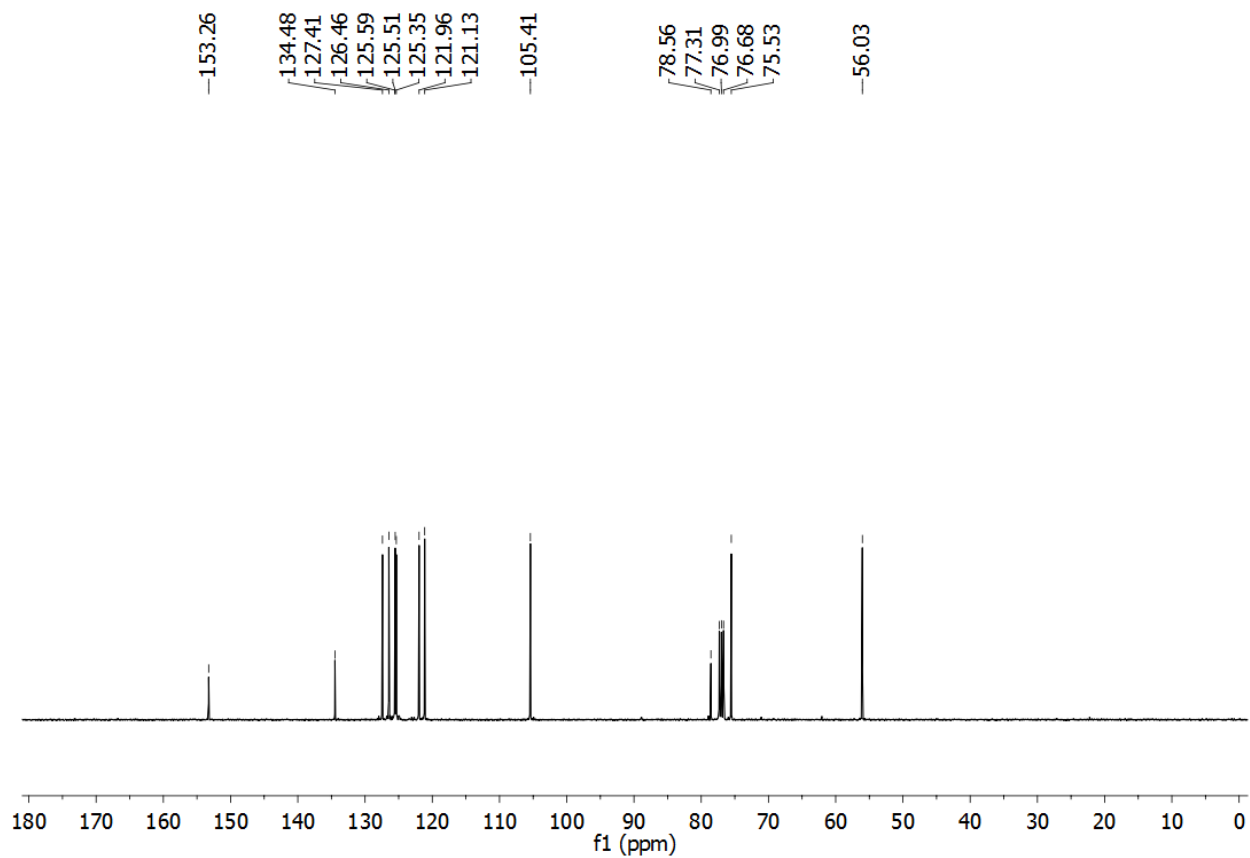

**<sup>1</sup>H NMR of R3 (400 MHz, CDCl<sub>3</sub>):**

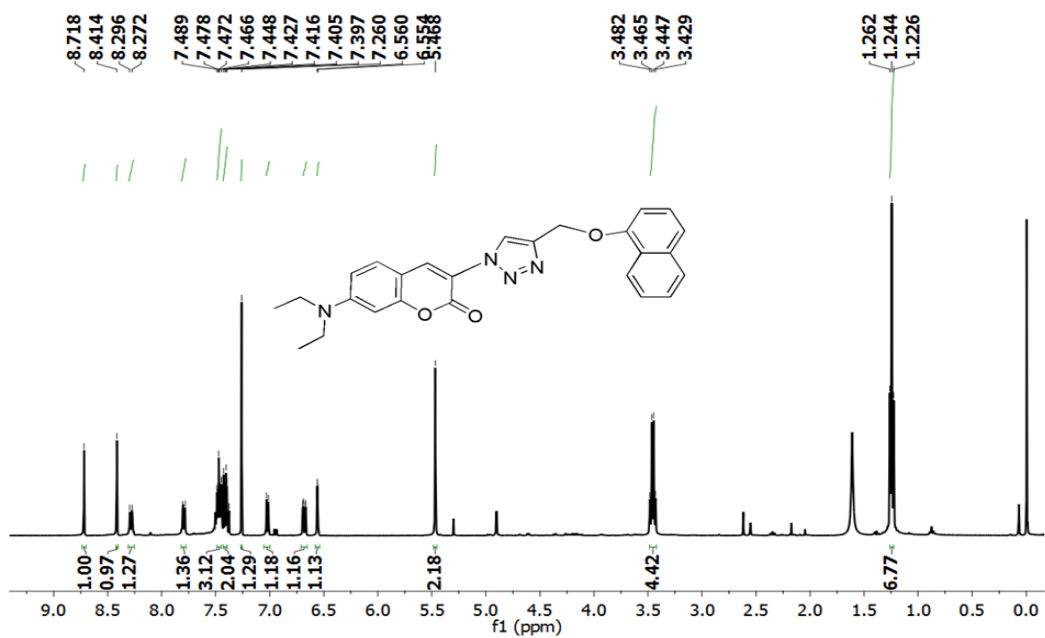

**<sup>13</sup>C NMR of R3 (100 MHz, CDCl<sub>3</sub>)**

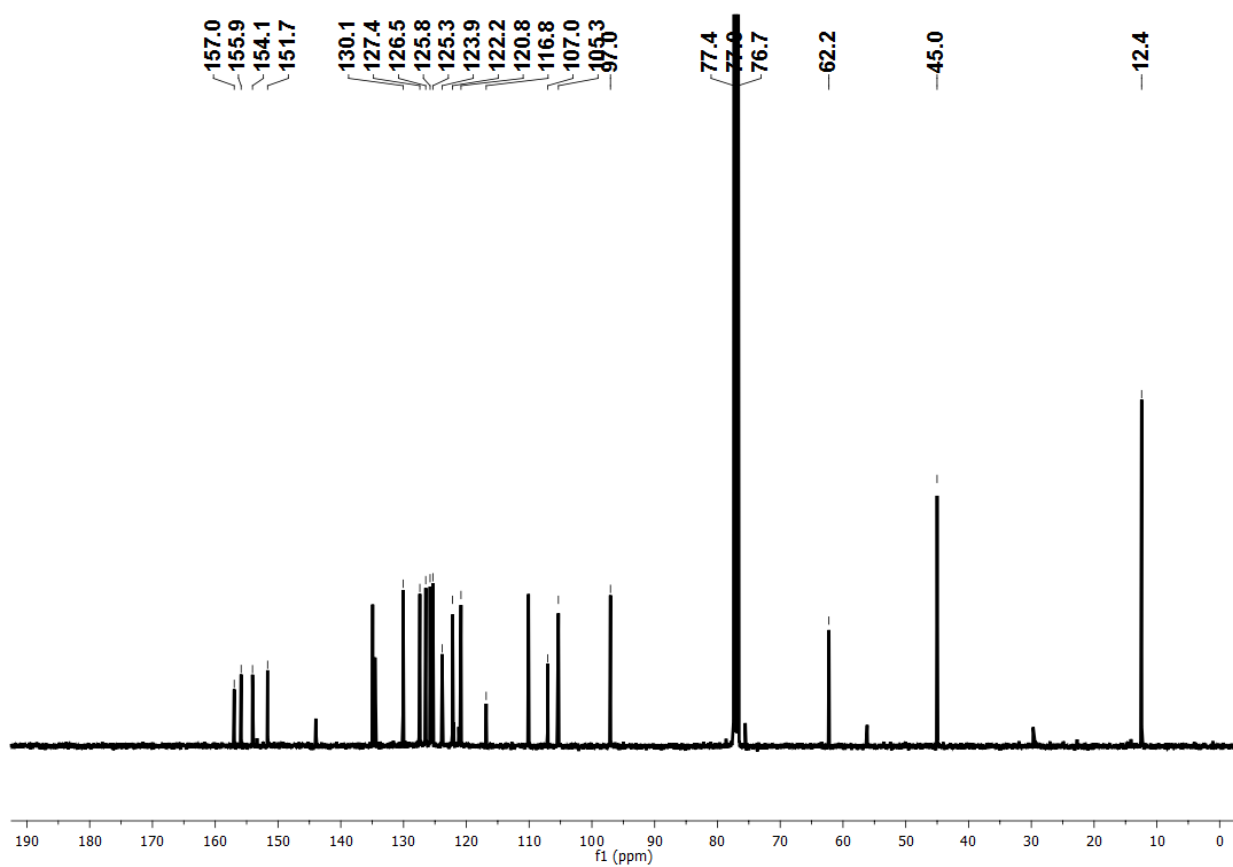

## FT-IR spectra of R3:

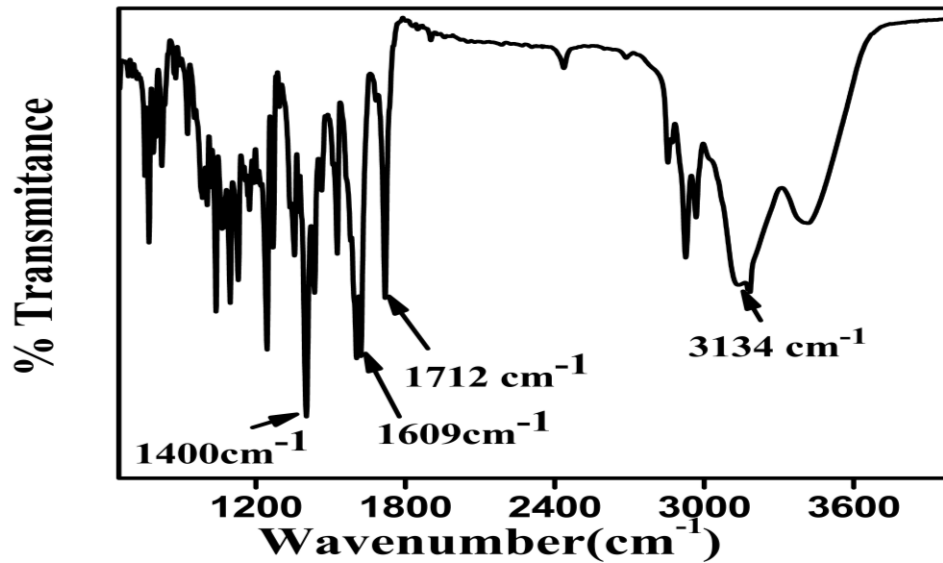

## HRMS Spectra (R3):

Calculated: 440.1848, Mass: 441.1915 [M+H]<sup>+</sup>

JR-5 #284 RT: 1.26 AV: 1 NL: 4.11E5  
T: FTMS + p ESI Full ms [133.4000-2000.0000]

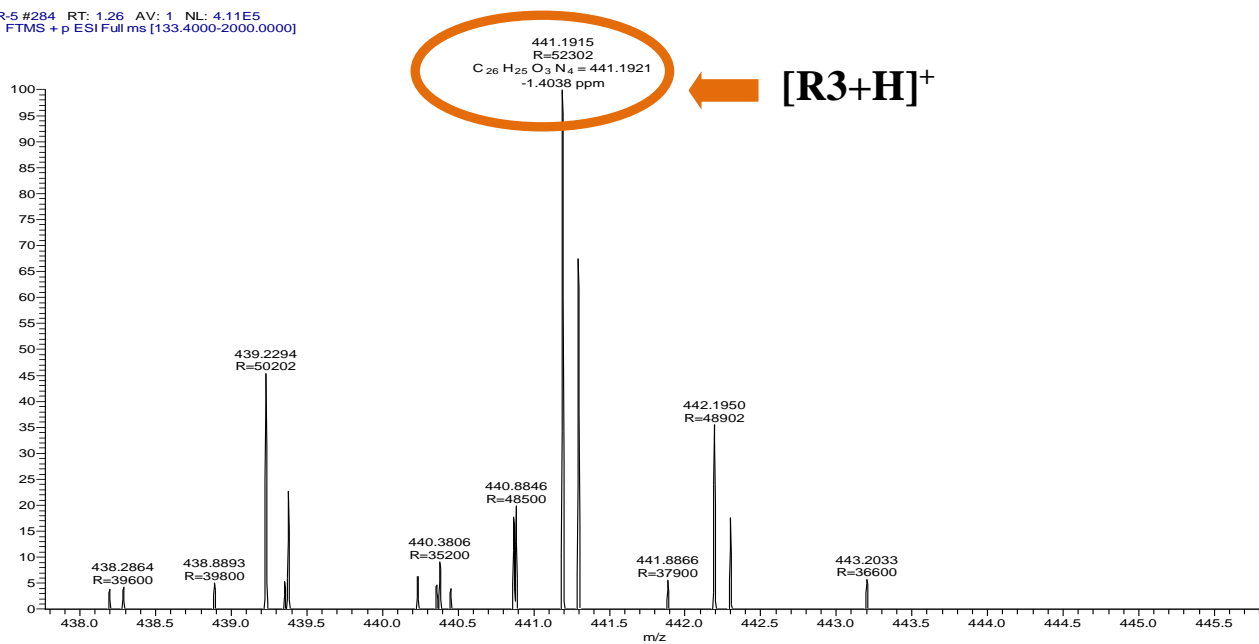

## Mass spectra of R1+Hg<sup>2+</sup>

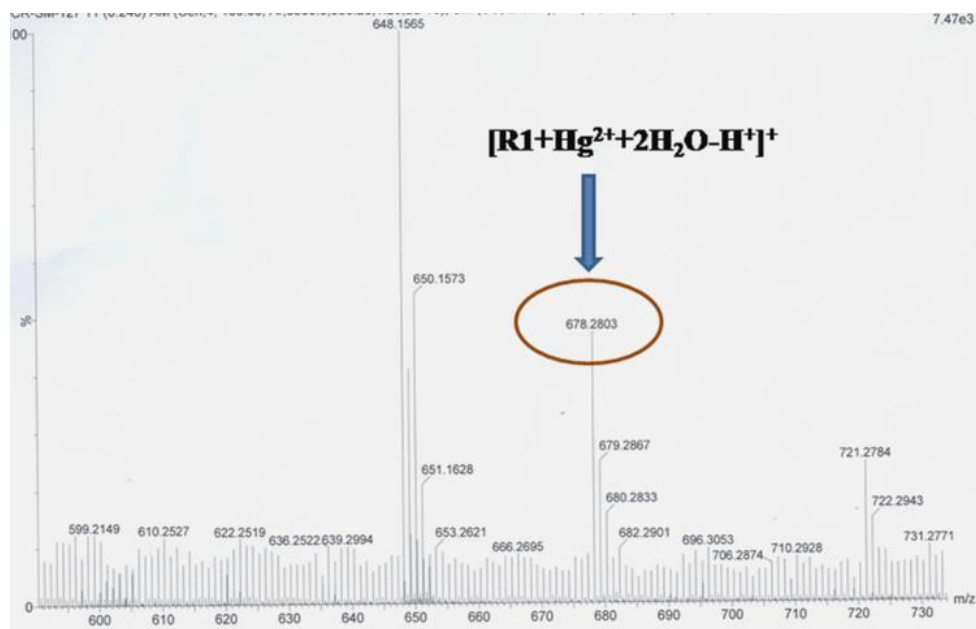

## FT-IR spectra of R1+Hg<sup>2+</sup> complex:

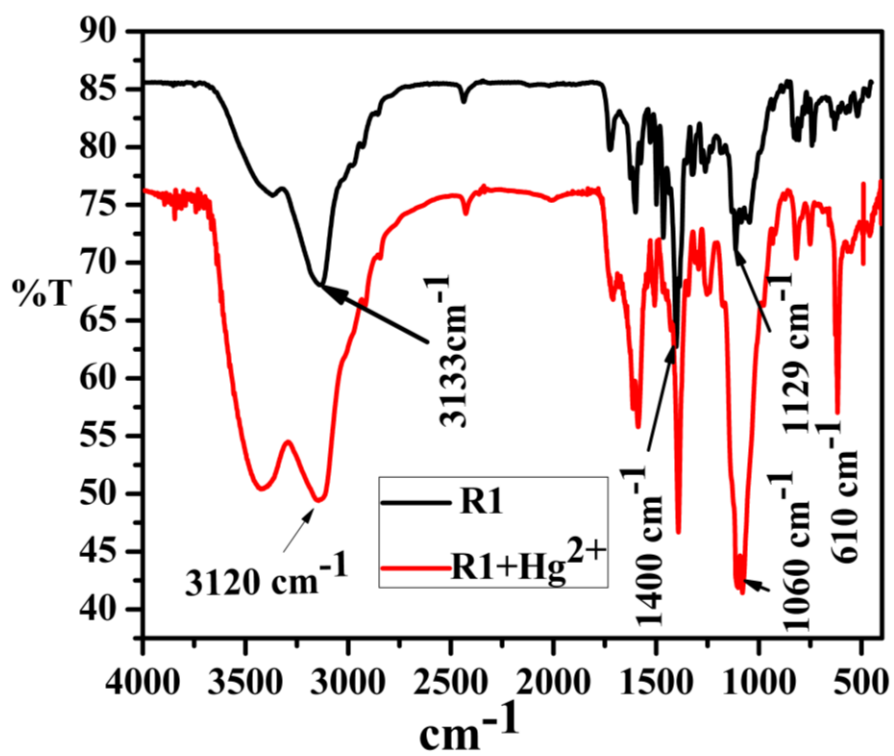

**Table T1** Fluorescence decay parameters of coumarin amine (C)-quinoline (Q) mixtures and **R1** at  $\lambda_{em}= 485$  nm (for coumarin) and 420 nm (for 8-OH quinoline).

| Sample ( $\lambda_{em}$ ) | $\tau_1$ (ns) | $a_1$  | $\tau_2$ (ns) | $a_2$  | $\langle\tau\rangle$ (ns) |
|---------------------------|---------------|--------|---------------|--------|---------------------------|
| C                         | 2.88          |        |               |        |                           |
| Q                         | 0.29          | 0.6149 | 1.075         | 0.3851 | 0.5059                    |
| Q:C::2:1 (420)            | 0.704         | 0.8836 | 2.51          | 0.116  | 0.913                     |
| Q:C::2:1 (485)            | 2.79          |        |               |        |                           |
| Q:C::1:1 ( 420)           | 0.851         | 0.916  | 3.17          | 0.083  | 0.8053                    |
| Q:C::1:1 (485)            | 2.81          |        |               |        |                           |
| Q:C::1:2 ( 420)           | 0.634         | 0.7265 | 1.87          | 0.2734 | 0.9718                    |
| Q:C::1:2 (485)            | 2.88          |        |               |        |                           |
| R1( 420)                  | 0.795         | 0.735  | 2.54          | 0.264  | 1.254                     |
| R1( 485)                  | 2.428         |        |               |        |                           |

**Table T2** Excited state decay parameters of **R1** with  $Hg^{2+}$  ;  $\lambda_{em} = 485$  nm.

| Sample ( $\lambda_{em}$ ) | $\tau_1$ (ns) | $a_1$ | $\tau_2$ (ns) | $a_2$ | $\langle\tau\rangle$ (ns) |
|---------------------------|---------------|-------|---------------|-------|---------------------------|
| R1                        | 2.43          |       |               |       |                           |
| R1Hg <sup>2+</sup> 6      | 0.623         | 0.469 | 2.51          | 0.530 | 1.622                     |
| R1 Hg <sup>2+</sup> 5     | 0.628         | 0.614 | 2.43          | 0.385 | 1.320                     |
| R1 Hg <sup>2+</sup> 4     | 0.77          | 0.850 | 3.04          | 0.149 | 1.11                      |
| R1 Hg <sup>2+</sup> 3     | 0.779         | 0.864 | 3.22          | 0.135 | 1.108                     |
| R1 Hg <sup>2+</sup> 2     | 0.817         | 0.891 | 3.37          | 0.108 | 1.092                     |
| R1 Hg <sup>2+</sup> 1     | 0.791         | 0.920 | 3.38          | 0.079 | 0.987                     |

**Table T3** Binding energy from DFT calculation.

| Binding Mode  | <b>R1-Hg<sup>2+</sup></b> energy (a. u.) | <b>R1</b> Energy (a. u.) | <b>Hg<sup>2+</sup></b> energy (a. u.) | Binding Energy (a. u.) |
|---------------|------------------------------------------|--------------------------|---------------------------------------|------------------------|
| <b>A-mode</b> | -1508.6479788128                         | -1466.4057308241         | -41.7070505095                        | -0.5351974792          |
| <b>B-mode</b> | -1508.6147256528                         | -1466.4057308241         | -41.7070505095                        | -0.5019443192          |



**Fig. S1** Absorption (a),(c) and emission spectra (b), (d) of **R2** and **R3** respectively with varying concentration of  $\text{Hg}^{2+}$ .

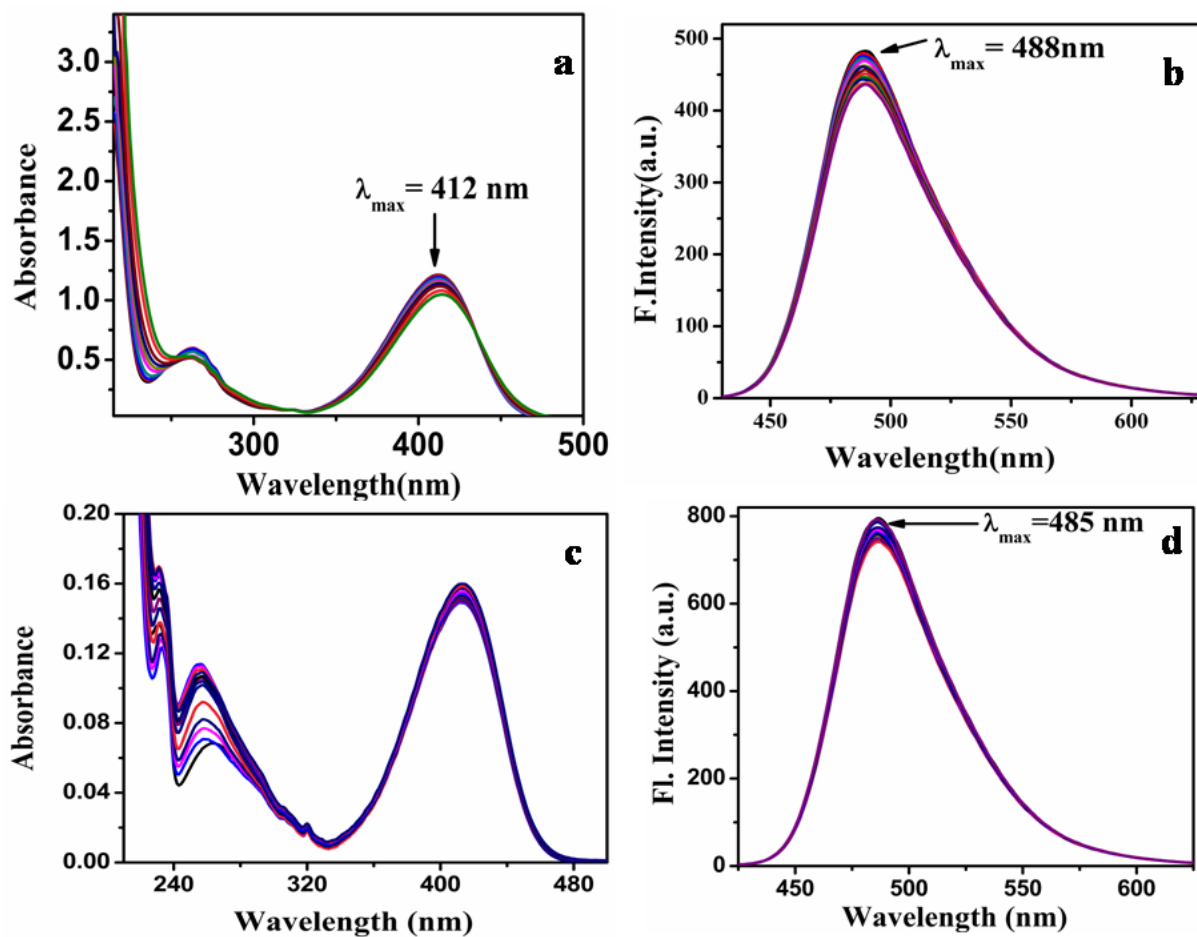

**Fig. S2** Sensing behavior of **R1** towards  $\text{Hg}^{2+}$  under long UV.

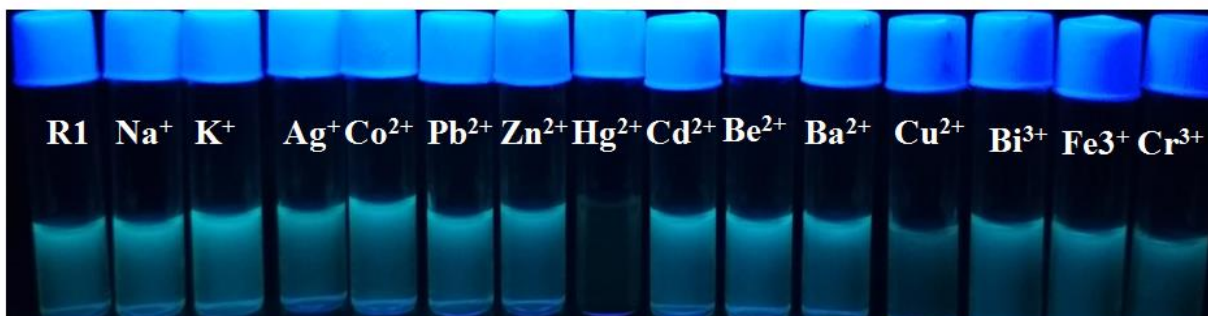

**Fig. S3** S–V plots from steady state fluorescence emission intensity (inset shows deviation from linearity at higher concentration).

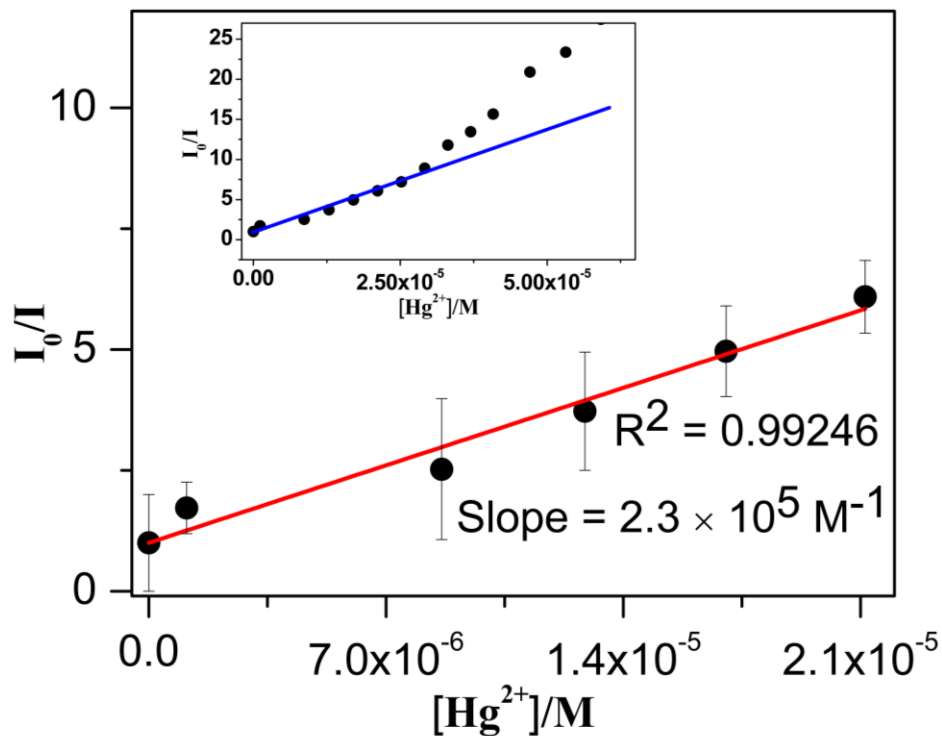

**Fig. S4** Lifetime measurement with other metal ion.

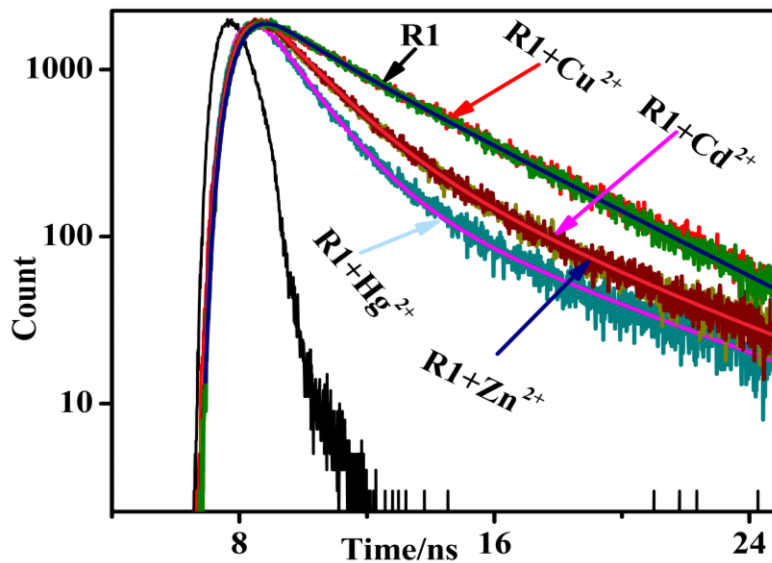

**Fig. S5** Fluorescence decay traces of **R1** and quinoline-coumarin mixture (2:1) at  $\lambda_{em}=485$  nm and 420 nm.

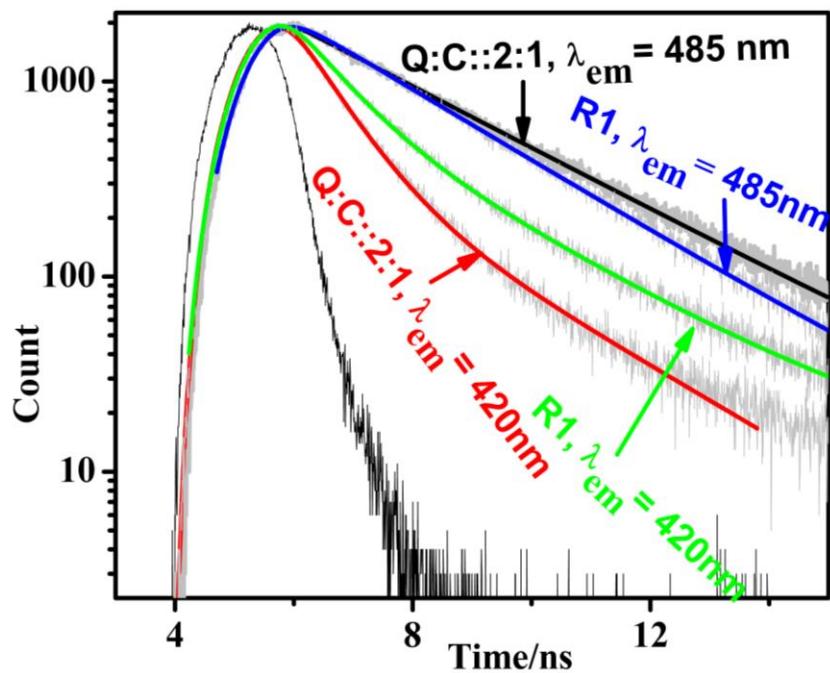

**Fig. S6** Binding constant calculation graph of **R1** with  $Hg^{2+}$  using Fluorescence titration by using linear regression analysis.

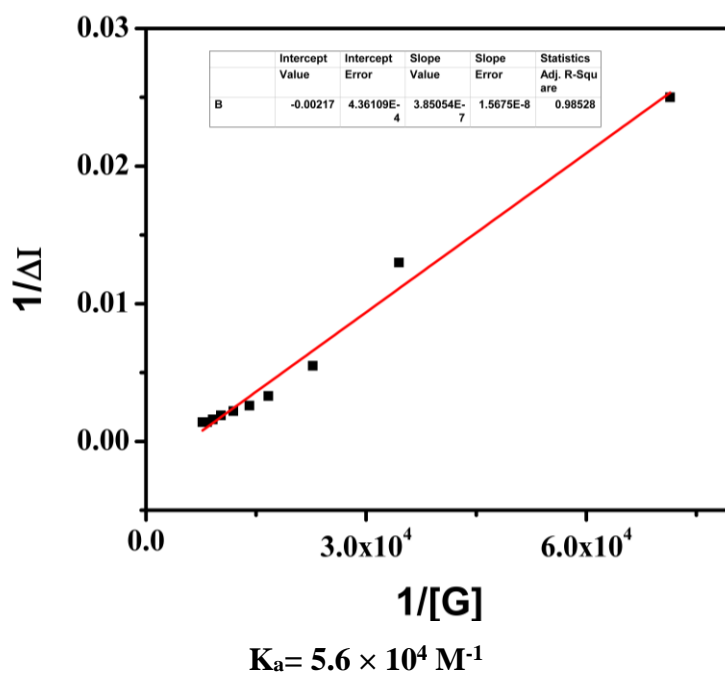

Binding constant was calculated using Benesi-Hildebrand linear regression analysis following equation (i) where association constant  $K_a = \text{intercept/slope}$ . For this, the reciprocal of intensity difference ( $1/\Delta I$ ), where  $\Delta I = (I - I_0)$ , was plotted against the reciprocal of concentration of guest ( $1/[G]$ )

$$1/(I - I_0) = 1/(I_\infty - I_0)K_a[G] + 1/(I_\infty - I_0) \quad \text{..... eqn. (i)}$$

**Calculation of limit of detection (LOD):**

Fluorescence titration data was used to calculate the limit of detection of **R1** with  $\text{Hg}^{2+}$ . To determine the standard deviation for the fluorescence intensity, the emission intensity of the individual receptors without any anion was measured by 10 times and the standard deviation of blank measurements was calculated. The limit of detection (LOD) of the receptor for sensing  $\text{Hg}^{2+}$  was determined from the following equation:

$$\text{LOD} = K \times \text{SD}/S$$

Where  $K = 2$  or  $3$  (we take  $3$  in this case);  $\text{SD}$  is the standard deviation of the blank receptor (**R1**) solution;  $S$  is the slope of the calibration curve.

**For R1 with  $\text{Hg}^{2+}$ :**

From the linear fit graph, we get slope =  $5.8 \times 10^6$ , and  $\text{SD}$  value is  $0.51$ . Thus using the above formula, we get the Limit of Detection =  $1.728 \times 10^{-7}$  M i.e. **R1** can detect  $\text{Hg}^{2+}$  up to this very lower concentration by fluorescence techniques.

**Fig. S7** LOD calculation curve of **R1** with  $\text{Hg}^{2+}$ .

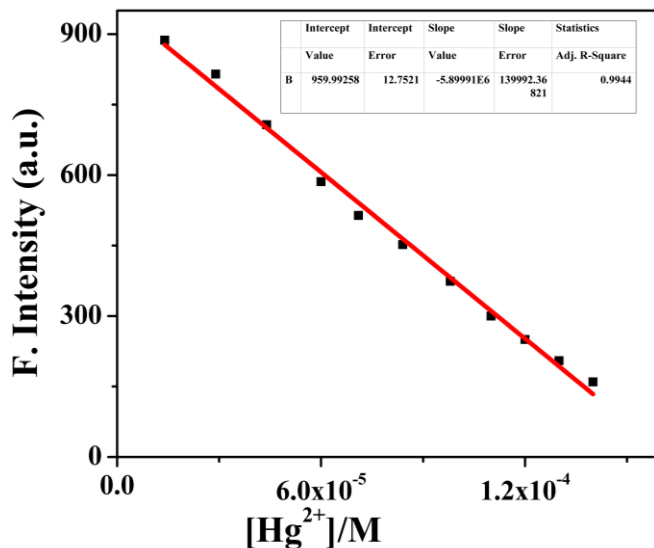

**Reversibility Study:**

**Fig. S8** Reversibility test of receptor and  $\text{R1+Hg}^{2+}$  complex with EDTA.

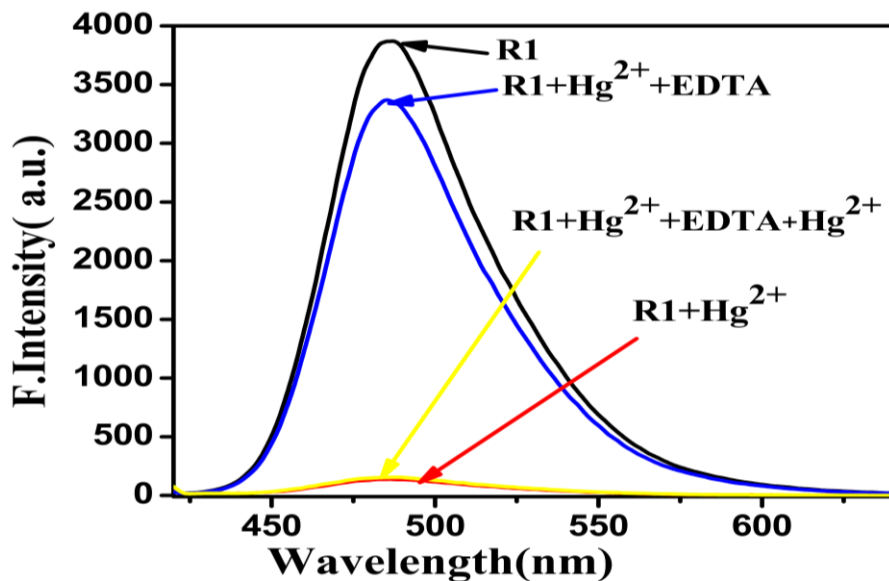

**Fig. S9** Reversibility test of receptor and  $\text{R1+Hg}^{2+}$  complex with  $\text{I}^-$ .

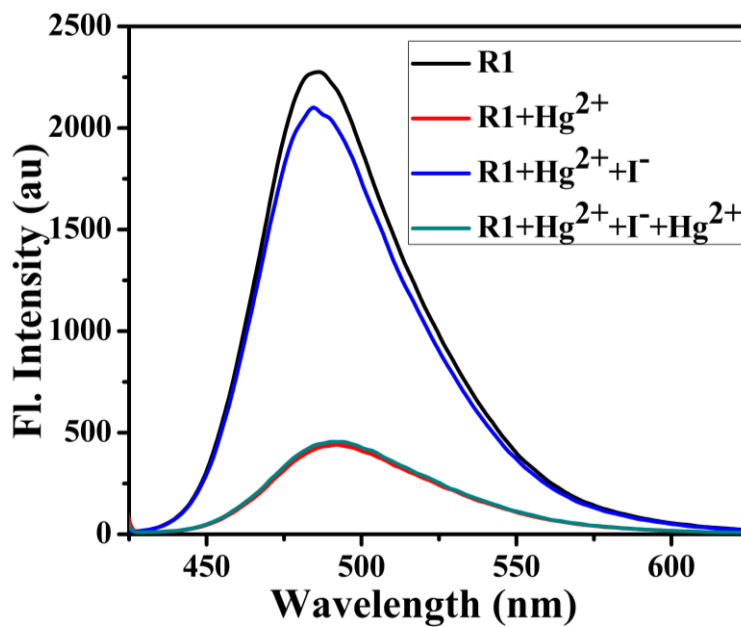

Job's plot:

Fig. S10 Job's plot of R1 with  $\text{Hg}^{2+}$  indicating the formation of 1: 1 complex species.

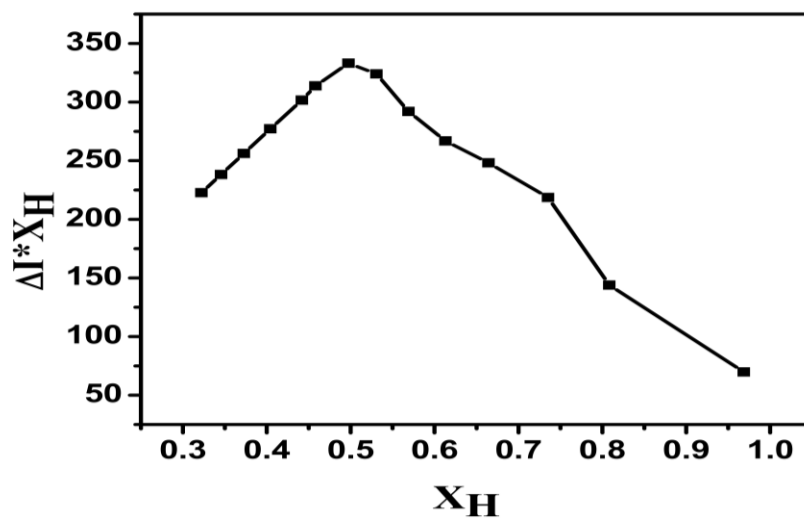

Fig. S11 Titration curve

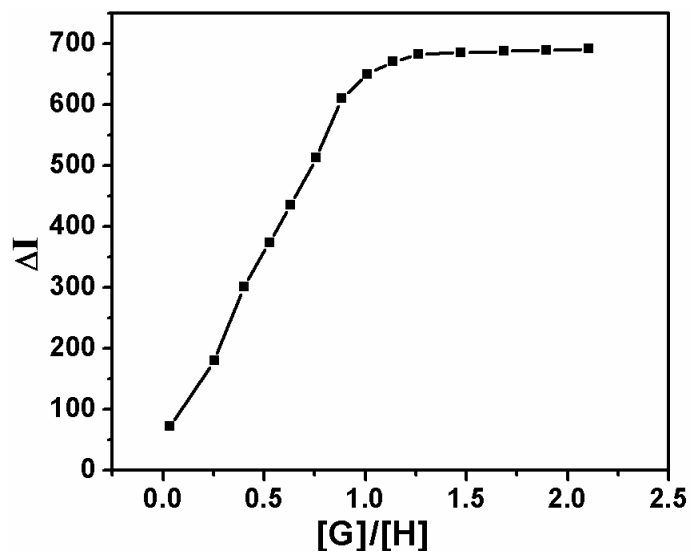

Fig. S12 Energy diagram for d-PET mechanism.

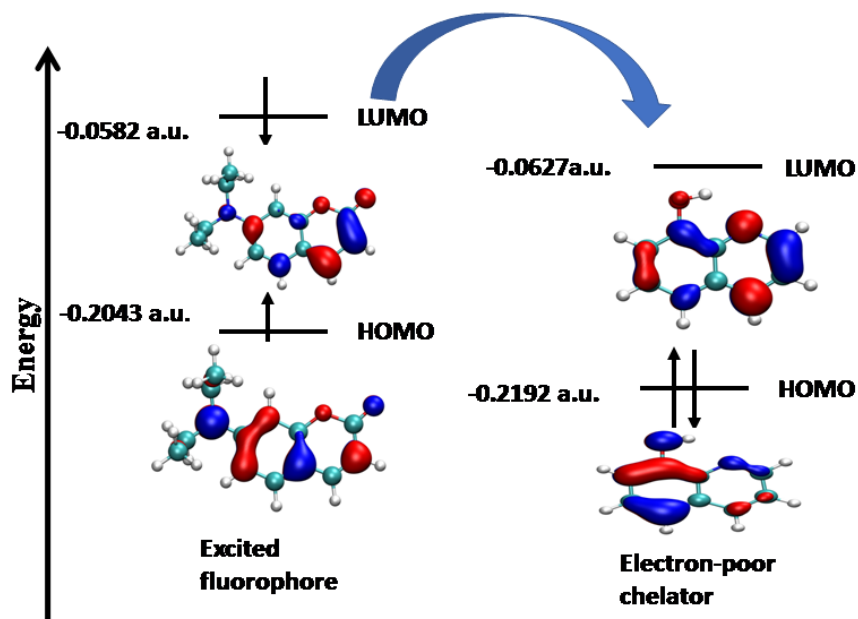

Table T4 Comparative table of triazole based sensor for Hg<sup>2+</sup> from reported literature

| Structures | Solvent                                   | Selectivity/<br>Detection<br>limit                       | Stoichiometry/<br>Crystal structure<br>of receptors | Cell-<br>Imaging<br>study | Ref |
|------------|-------------------------------------------|----------------------------------------------------------|-----------------------------------------------------|---------------------------|-----|
|            | CH <sub>3</sub> CN/H <sub>2</sub> O(9 :1) | 0.01 μM<br>0.44 μM                                       | 1:2/Not given                                       | Not performed             | 1   |
|            | THF/H <sub>2</sub> O(1:9)                 | Not Mentioned                                            | Not Mentioned/<br>Not Given                         | Not performed             | 2   |
|            | CH <sub>3</sub> CN/H <sub>2</sub> O(5 :1) | 0.09 μM(Hg <sup>2+</sup> )<br>1.02 μM(Cu <sup>2+</sup> ) | 1:2/ Not given                                      | Not performed             | 3   |

|                                                                                                                                                                                                                          |                    |                                                        |                                        |               |              |
|--------------------------------------------------------------------------------------------------------------------------------------------------------------------------------------------------------------------------|--------------------|--------------------------------------------------------|----------------------------------------|---------------|--------------|
| 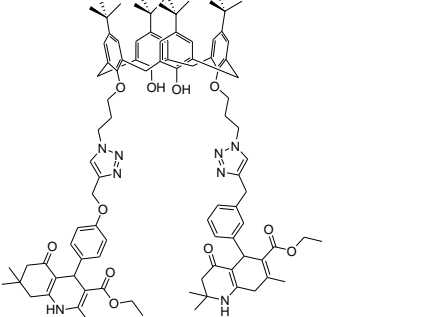                                                                                                                                        | CH <sub>3</sub> CN | 2.0 μM                                                 | 1:2/ Not Given                         | Performed     | 4            |
| <br>2: R <sub>1</sub> = CH <sub>3</sub> , R <sub>2</sub> = H<br>3: R <sub>1</sub> = H, R <sub>2</sub> = CH <sub>2</sub> CH <sub>3</sub> | CH <sub>3</sub> CN | 3 ppb                                                  | 1:1/ Not Given                         | Performed     | 5            |
|                                                                                                                                         | HEPES Buffer       | Zn <sup>2+</sup> , Cd <sup>2+</sup> , Hg <sup>2+</sup> | 1:2, 1:2, 1:1 Respectively/ Given      | Not performed | 6            |
|                                                                                                                                        | CH <sub>3</sub> CN | Ni <sup>2+</sup> , Hg <sup>2+</sup>                    | 1:1/ Not given                         | Not performed | 7            |
|                                                                                                                                       | CH <sub>3</sub> OH | Hg <sup>2+</sup><br>17.2 μM                            | 1:1/ All the three receptors are given | Performed     | Present work |

## 2. Experimental

### *Preparation of 7-(Diethylamino)-3-nitro-2H-chromen-2-one(1) :*<sup>8</sup>

A mixture containing n-butanol (20 mL), 4-diethylamino salicylaldehyde (1.4 g, 7.2 mmol), ethyl nitroacetate (0.8 mL, 7.2 mmol), molecular sieves 4 Å (100 mg), piperidine (0.1 mL) and acetic acid (0.2 mL) was refluxed for a period of 24 h. Upon cooling to room temperature, a bright yellow solid formed, which was collected and dissolved in DMF (15 mL) at 80 °C. It was filtered again to remove the molecular sieves. The filtrate, upon addition to 100 ml of ice-cold water, yielded 3-nitro-7-diethylamino coumarin as a bright yellow solid: 1.40 g, 73 %. A small amount of this compound was recrystallized from DMF to give an analytical sample; m.p. 193-195 °C.



***Preparation of 3-amino-7-(Diethylamino)-2H-chromen-2-one(2) :***

In a 25 mL round bottomed flask equipped with a magnetic stirrer, were placed in order, 37.4% HCl (5 mL), stannous chloride dihydrate (1.6 g, 7.12 mmol). To this suspension 3-nitro-7-diethylamino coumarin (0.25 g, 0.95 mmol) was added at room temperature in small portions, over a period of thirty minutes. Stirring was continued for 4 h before the solution was poured onto 20 g of ice and made alkaline using sodium hydroxide solution (5 M) at 15 °C using an ice-water bath. The resulting suspension was then extracted with diethyl ether (2 X 25 mL). The organic layer was washed with water (50 mL), dried over anhydrous sodium sulfate and concentrated to a pasty residue which upon triturating using hexane yielded 3-amino-7-diethylaminocoumarin as a pale yellow solid: 0.15 g, 68%. A small amount of this compound was recrystallized in ethyl acetate / hexane to give an analytical sample; m.p. 85-87 °C.

***Preparation of 3-azido-7-(Diethylamino)-2H-chromen-2-one(2) :***

7-Diethylamino-3-amino coumarin (100 mg, 0.43 mmol) was dissolved slowly in HCl aq. (17.2%, 4 mL) at room temperature. Upon cooling to 0-5 °C and addition of a solution of NaNO<sub>2</sub> (30 mg, 0.43 mmol), the reaction mixture was stirred for 1 hour at 0-5 °C. This was followed by the addition of potassium acetate (2 g) in water (5 mL) to adjust the pH of the resulting solution to 4. Sodium azide (57 mg, 0.88 mmol) was added in portions at 0-5 °C, the mixture stirred at 0-5 °C for another five hours. The precipitated product was rapidly filtered, washed with ice-cold water (10 mL) and dried under vacuum to yield the final product as a yellow solid.

**References**

1. Shi, W. J.; Liu, J. Y.; Lo, P. C.; Ng, D. K., Selective Detection of Hg<sup>2+</sup> Ions with Boron Dipyrromethene-Based Fluorescent Probes Appended with a Bis (1, 2, 3-Triazole) Amino Receptor. *Chem.: Asian J.* **2019**, *14*, 1059-1065.
2. Wei, G.; Jiang, Y.; Wang, F., A New Click Reaction Generated Aie-Active Polymer Sensor for Hg<sup>2+</sup> Detection in Aqueous Solution. *Tetrahedron Lett.* **2018**, *59*, 1476-1479.
3. Huang, Y.; Li, C.-F.; Shi, W.-J.; Tan, H.-Y.; He, Z.-Z.; Zheng, L.; Liu, F.; Yan, J.-W., A near-Infrared Bodipy-Based Fluorescent Probe for Ratiometric and Discriminative Detection of Hg<sup>2+</sup> and Cu<sup>2+</sup> Ions in Living Cells. *Talanta* **2019**, *198*, 390-397.

4. Khan, B.; Hameed, A.; Minhaz, A.; Shah, M. R., Synthesis and Characterisation of Calix [4] Arene Based Bis (Triazole)-Bis (Hexahydroquinoline): Probing Highly Selective Fluorescence Quenching Towards Mercury (Hg<sup>2+</sup>) Analyte. *Journal of hazardous materials* **2018**, *347*, 349-358.
5. Arivazhagan, C.; Borthakur, R.; Ghosh, S., Ferrocene and Triazole-Appended Rhodamine Based Multisignaling Sensors for Hg<sup>2+</sup> and Their Application in Live Cell Imaging. *Organometallics* **2015**, *34*, 1147-1155.
6. Areti, S.; Bandaru, S.; Rao, C. P., Triazole-Linked Quinoline Conjugate of Glucopyranose: Selectivity Comparison among Zn<sup>2+</sup>, Cd<sup>2+</sup>, and Hg<sup>2+</sup> Based on Spectroscopy, Thermodynamics, and Microscopy, and Reversible Sensing of Zn<sup>2+</sup> and the Structure of the Complex Using Dft. *ACS Omega* **2016**, *1*, 626-635.
7. Hemamalini, A.; Mudedla, S. K.; Subramanian, V.; Das, T. M., Design, Synthesis and Metal Sensing Studies of Ether-Linked Bis-Triazole Derivatives. *New J. Chem.* **2015**, *39*, 3777-3784.
8. Sivakumar, K.; Xie, F.; Cash, B. M.; Long, S.; Barnhill, H. N.; Wang, Q., A Fluorogenic 1, 3-Dipolar Cycloaddition Reaction of 3-Azidocoumarins and Acetylenes. *Org. Lett.* **2004**, *6*, 4603-4606.
